# Supplementary material for: Low-cost photodynamic therapy devices for global health settings: Characterization of battery-powered LED performance and smartphone imaging in 3D tumor models
Source: PubMed Central journal article supplement (PMC4428052; doi:10.1038/srep10093), 2015-05-12
Supplement: srep10093-s1.pdf [file srep10093-s1.pdf]

## Supplemental Material

### **Low-cost photodynamic therapy devices for global health settings: Characterization of battery-powered LED performance and smartphone imaging in 3D tumor models**

Joshua Hempstead,<sup>a\*</sup> Dustin P. Jones,<sup>a\*</sup> Abdelali Ziouche,<sup>b</sup> Gwendolyn M.

Cramer,<sup>a</sup> Imran Rizvi,<sup>c</sup> Stephen Arnason,<sup>a</sup> Tayyaba Hasan,<sup>c</sup> Jonathan P. Celli<sup>a</sup>

<sup>a</sup>Department of Physics, University of Massachusetts, Boston, MA 02125, USA

<sup>b</sup>Laboratoire de Physique des Lasers, Université Paris 13, 93430 Villetaneuse, France

<sup>c</sup>Wellman Center for Photomedicine, Massachusetts General Hospital, Boston, MA  
02114, USA

*\*Equal contribution*

Address correspondence to: Jonathan Celli (jonathan.celli@umb.edu)

## Supplemental Figure 1

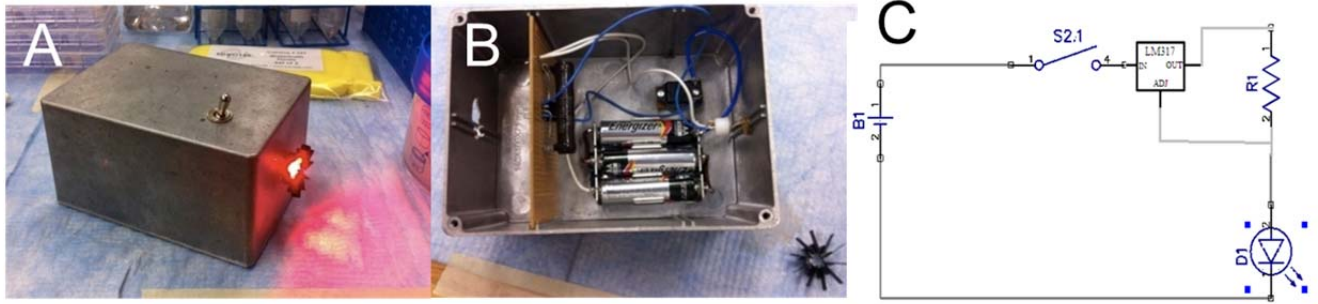

### Supplemental Figure 1: LED irradiation device photographs and schematic.

Photographs of the exterior **(A)** and interior **(B)** of the device used. The battery-powered circuit showing the battery source (B1), LED (D1), power resistor (R1), voltage regulator (LM317) and switch (S2.1) is depicted in **(C)**.

## Supplemental Figure 2

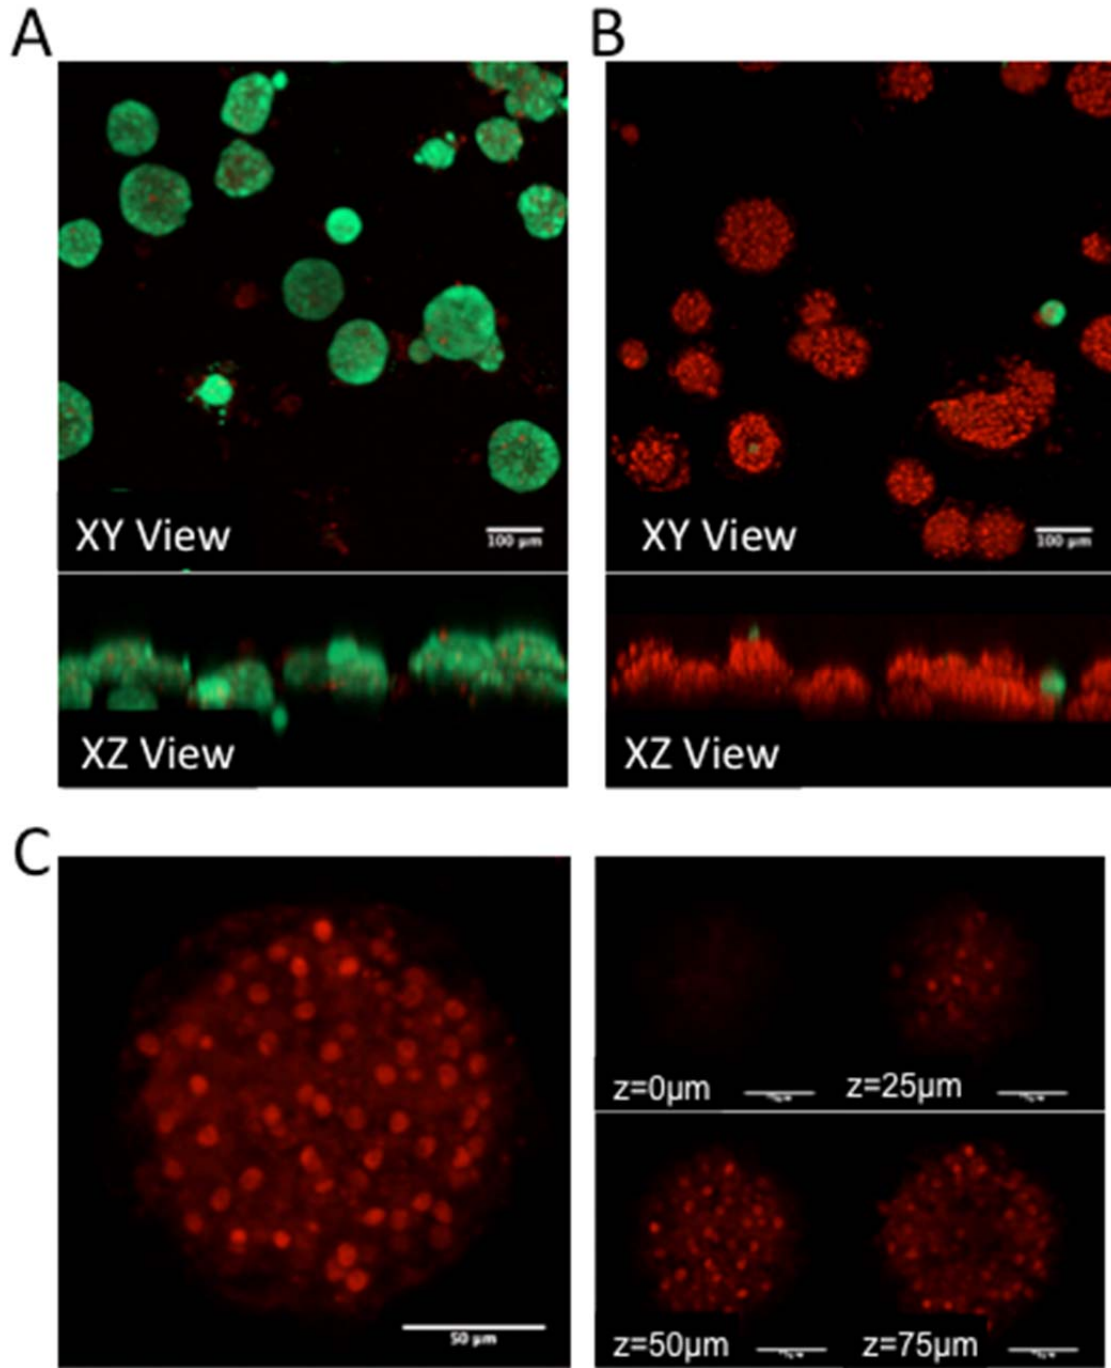

Supplemental Figure 2: Depth resolved cytotoxic response in 3D tumour models stained with calcein AM (green) and ethidium bromide (red) imaged via confocal microscopy. Large spatial fields showing XY (max intensity Z projection) and XZ views

of untreated cultures (A) and cultures treated with  $80\text{J}/\text{cm}^2$  ALA-PDT with light delivered via battery-powered device (B). 3D nodules are approximately spherical as previously characterized in other cell lines and have mean diameter (and equivalent depth) of  $101 \pm 27$   $\mu\text{m}$  with nearly complete cytotoxic destruction throughout. A zoomed in view of a representative 3D nodule in (C) shows depth resolved cytotoxic response in each optical section.
